# Supplementary material for: Separable actions of acetylcholine and noradrenaline on neuronal ensemble formation in hippocampal CA3 circuits
Source: PLOS journal article supplement (doi:10.1371/journal.pcbi.1009435), 2021-10-01
Supplement: S2 (10.1371/journal.pcbi.1009435.s002) [file journal.pcbi.1009435.s002]

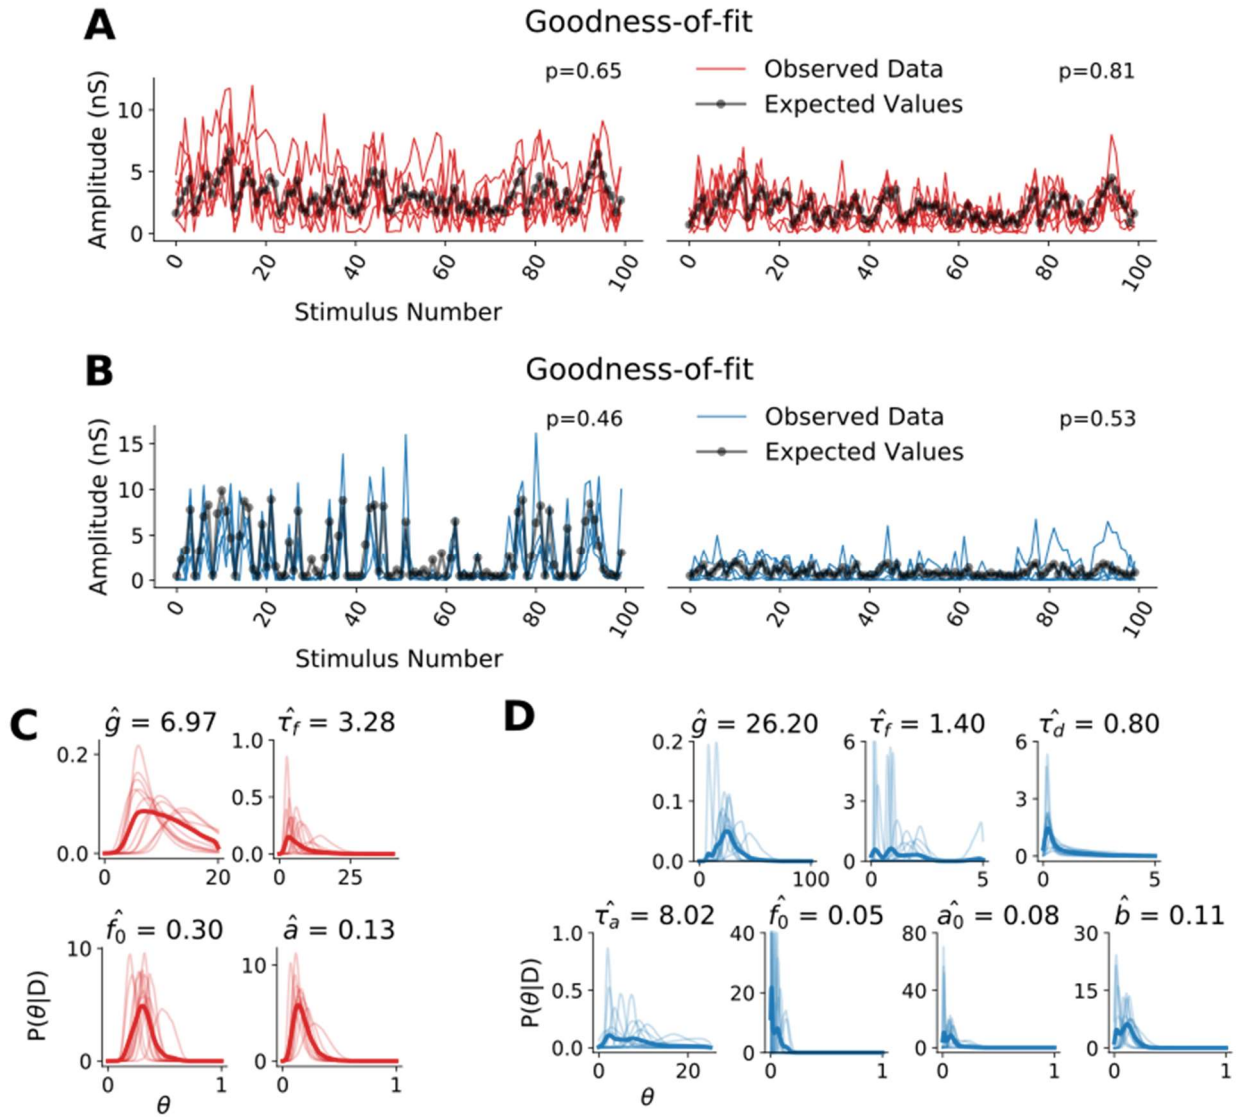

**S2 Fig:** A-B) Goodness-of-fit for EPSC (A) and IPSC (B) short-term plasticity models assessed by Bayesian posterior predictive  $p$ -values. Plots show the observed data for all experiments (EPSCs and IPSCs respectively) together with the expected values from the model before and after the application of 5  $\mu$ M carbachol.  $p$ -values close to 0.5 indicate best fit. C-D) Posterior distributions for parameters of best fitting models given data for EPSCs (C) and IPSCs (D).
